# Supplementary material
Source: PubMed Central journal article supplement (PMC10404025)
Supplement: NIHMS1921752-supplement-1.pdf [file NIHMS1921752-supplement-1.pdf]

**Table S1. Unadjusted event rates by race/ethnicity**

|                               | <b>Dialysis</b>                |                                     |
|-------------------------------|--------------------------------|-------------------------------------|
| <i>Cohort</i>                 | <i>N achieving outcome (%)</i> | <i>Events per 1000 person-years</i> |
| NH White                      | 8,161 (20.4)                   | 76                                  |
| NH Black                      | 3,190 (37.4)                   | 157                                 |
| NH Black, no race coefficient | 3,449 (30.6)                   | 115                                 |
| Hispanic                      | 1,346 (37.7)                   | 165                                 |
|                               | <b>Death</b>                   |                                     |
| <i>Cohort</i>                 | <i>N achieving outcome (%)</i> | <i>Events per 1000 person-years</i> |
| NH White                      | 13,532 (33.8)                  | 126                                 |
| NH Black                      | 1,849 (21.7)                   | 91                                  |
| NH Black, no race coefficient | 2,577 (22.9)                   | 86                                  |
| Hispanic                      | 490 (13.7)                     | 60                                  |
|                               | <b>Kidney Transplant</b>       |                                     |
| <i>Cohort</i>                 | <i>N achieving outcome (%)</i> | <i>Events per 1000 person-years</i> |
| NH White                      | 1,240 (3.1)                    | 11                                  |
| NH Black                      | 221 (2.6)                      | 10                                  |
| NH Black, no race coefficient | 269 (2.4)                      | 9                                   |
| Hispanic                      | 126 (3.5)                      | 15                                  |
